# Supplementary material for: Altered transcriptomic immune responses of maintenance hemodialysis patients to the COVID-19 mRNA vaccine
Source: eLife. 2024 Apr 24;13:e83641. doi: 10.7554/eLife.83641 (PMC11042800; doi:10.7554/eLife.83641)
Supplement: Supplementary file 1. [file elife-83641-supp1.csv]

	enrichmentScore	NES	p.adjust	core_enrichment	Median_MemberGene_WaldStat
LI.M11.0 enriched in monocytes (II)	0.518050893	1.611218625	2.75E-08	MYOF/TYMP/FCGR1B/HSPA6/SECTM1/FCGR1A/P2RY13/LMO2/FGR/SIGLEC9/SLC31A2/MSRB1/ASGR1/NFE2/IFI30/FGL2/HK3/AIF1/CD1D/ASGR2/APOBR/LILRB3/AQP9/MTMR11/LILRA6/SORT1/TNS3/LRP1/PLXNB2/MNDA/TNFSF13/LAT2/CSF1R/CYFIP1/SIGLEC7/S100A8/LILRA1/CEBPA/ALOX5/S100A11/FCER1G/MS4A4A/FBP1/SIRPB1/NCF1/FES/STAB1/BTK/TLR8/IGSF6/S100A9/GRN/FCN1/SERPINA1/PRAM1/ADAP2/RNASE2/LY86/FCAR/PLXDC2/KIAA0513/CRISPLD2/HCK/CD14/S100A12/TY…	1.226581987
LI.M37.0 immune activation - generic cluster	0.433615695	1.375557452	8.00E-06	DYSF/PTX3/FOXO1/CEBPE/P2RY13/FCGR2C/SIGLEC9/NUP37/PSRC1/PFKFB4/SLC19A2/SAC3D1/STEAP4/ARHGEF10L/CAMK4/ELOVL4/B3GNT5/NFE2/HK3/TNFAIP6/MMP9/OSCAR/GPBAR1/ACSL1/ROPN1L/SAMHD1/APOBR/AQP9/DHCR24/LRP1/BEX1/KLF5/CKAP2/ICOSLG/LAT2/CYFIP1/GPR84/NCF4/S100A8/PTK2/FCGR3A/BLM/BRCA2/MS4A4A/LRRK2/FBP1/PTGS2/NME8/CCR9/SIRPB1/RUNX2/IQGAP3/RNASE3/CHI3L1/TUBG1/BTK/ARAP3/JAG1/NCAPD2/NACC2/PRAM1/ADAP2/DEFA4/ERI2/RNASE2…	0.277348491
LI.M75 antiviral IFN signature	0.737741321	1.969974946	2.20E-05	SERPING1/OAS1/DDX60/PTX3/IFIT1/C1QB/DHX58/RSAD2/PML/IL1B/BCL3/OAS3/HERC5/CARD9	1.588839215
LI.M86.0 chemokines and inflammatory molecules in myeloid cells	0.748404836	1.977302148	6.20E-05	CCL20/CCL4/NFKBIA/ADORA2A/HS3ST3B1/TNFAIP6/TNFAIP3/IL1B/PDE4B/NFKB1/CXCL2/TNF/TRAF1/BCL2A1/G0S2/CXCL1	-1.953479059
LI.M4.0 cell cycle and transcription	0.413153892	1.312304286	0.000161739	MYOF/TYMP/EZH2/FCGR1B/HSPA6/SECTM1/FCGR1A/CENPA/BUB1B/CDCA3/LMO2/ATAD2/FGR/TICRR/LRRC25/HMOX1/SLC31A2/MSRB1/ASGR1/IFI30/FGL2/PRC1/RAD54L/AIF1/CD1D/ASGR2/CD300LF/LILRB3/SKA1/HELLS/MTMR11/LILRA6/SORT1/TNS3/CDC25A/BRCA1/SPC25/PLXNB2/KIF23/MNDA/TNFSF13/CSF1R/SIGLEC7/LILRA1/TCF19/CEBPA/ALOX5/S100A11/FCER1G/CENPF/NCF1/FES/STAB1/CHEK1/WDFY3/TLR8/RFC4/IGSF6/RFC3/S100A9/CCNE2/GRN/FCN1/SERPINA1/KIF20B/FANC…	0.546320192
LI.M86.1 proinflammatory dendritic cell, myeloid cell response	0.802241117	2.02059172	0.00016853	CCL20/CCL4/CD80/ADORA2A/HS3ST3B1/TNFAIP6/IL1B/PDE4B/SERPINB9/TNF/STAT4/IFNG	-2.086140752
LI.M111.0 viral sensing & immunity; IRF2 targets network (I)	0.730701048	1.889489974	0.000432367	IFI35/THBS1/BST2/USP18/AIF1/TNFSF13B/PSMB8/TAP1/EREG/RIPK2/ZBP1/FES/LY86/CTSS/CXCL16/KYNU/TLR7	1.716516113
LI.M4.3 myeloid cell enriched receptors and transporters	0.626103521	1.730566219	0.000975297	MYOF/SIGLEC16/SECTM1/LRRC25/ASGR1/GPBAR1/CD1D/MTMR11/SIGLEC7/LILRA1/TLR8/IGSF6/CD14/MARCO/CLEC4A/SLC24A4/MS4A14/KCTD12/MPEG1/CHST15/CD86/SLC2A6/CCR1	1.480965712
LI.M29 proinflammatory cytokines and chemokines	0.803922563	1.921191434	0.001479637	IL6/PTX3/IL1A/CCL20/CCRL2/IL1B/CCL3/TNF/CCL3L3	-2.208651223
LI.S11 Activated (LPS) dendritic cell surface signature	0.582230915	1.638833558	0.001479637	SIGLEC1/RNF144B/IFI6/ITGB8/CD80/NINJ1/IFI27/SLC31A2/SLC41A2/TNFSF13B/EREG/TGFA/SGPP2/CALCRL/ELOVL7/LRRC32/CSF2RB/PRRG4/LY75/CD274/ANTXR2	-0.094808592
LI.M118.0 enriched in monocytes (IV)	0.531771639	1.543543009	0.002779789	DYSF/PTX3/PAK1/STEAP4/ARHGEF10L/SMARCD3/HHEX/ACSL1/TNFSF13B/SAMHD1/LTBR/CARD9/LRRK2/PTGS2/NACC2/DOK3/C1orf162/SLC24A4/PGD/NAIP/CTSS/BCL6/LY96/HLA-DMB/TMEM176B/LYZ/IL1R2/CD68/MYO1F/DUSP6/CXCR2/TLR1/PID1/PADI4	1.00625753
LI.M24 cell activation (IL15, IL23, TNF)	0.718211866	1.808948605	0.004932131	SERPING1/NFKB2/TF/MAP3K8/TNFAIP3/BCL3/PDGFRA/CD83/A2M/TNF	-1.701584012
LI.M43.0 myeloid, dendritic cell activation via NFkB (I)	0.70834219	1.784090011	0.006393581	NFKB2/RELB/ICAM1/SAMSN1/MAP3K8/BCL3/NFKBID/CD83/TNF/FUT7/VCAM1	-1.946807783
LI.M4.13 cell junction (GO)	0.713844323	1.737234631	0.030060852	CTNNA1/PAK1/IFI30/TNS3/FES/HOMER3/HCK/KCTD12/PRKCD/LCP1	1.593969312
LI.M160 leukocyte differentiation	0.64337203	1.652058512	0.030060852	IL1A/NFKB2/NR4A2/BCL3/BTG2/CD83/KLF6/KLF13/JUNB	-1.614982121
LI.M165 enriched in activated dendritic cells (II)	0.533566424	1.491137179	0.030823037	SIGLEC1/PARP9/SERPING1/CCL20/IFIT1/IFI27/RSAD2/FAM20C/TNFAIP6/IFIT3/HERC5/CSF2RB/HLX/BCL2A1/PRRG4/IL18/HESX1/PDGFC/IFIT2/MGST1	0.809333488
LI.M11.2 formyl peptide receptor mediated neutrophil response	0.710785839	1.698615923	0.031184677	SECTM1/PAK1/IGSF6/NCF1C/SLC11A1/CAMK1/FCGR2A/PILRA/NCF2	1.212924967
LI.M37.3 cell division	0.709617139	1.695822995	0.031184677	NUP37/SAC3D1/CKAP2/BLM/RUVBL1/NCAPD2/VRK1	1.127239573
LI.M127 type I interferon response	0.685124627	1.693760946	0.031887475	PARP9/DDX60/STAT1/IFIT1/USP18/RSAD2/TAP1/HERC5	2.275873596
LI.M191 transmembrane transport (II)	0.633996094	1.62798287	0.031887475	SLC19A2/NUP54/SLC12A2/ACSL5/CUL5/KCNK5/SIRT1	-0.210806583
LI.M33 inflammatory response	0.70201541	1.708447406	0.03481658	AIF1/APOBR/TNFSF13/CARD9/FCER1G/STAB1/ARRB2/TYROBP/TBC1D8/GPX1	1.708431932
LI.M150 innate antiviral response	0.679785392	1.680561321	0.034982613	OAS1/IFIT1/RSAD2/TAP1/OAS3/APOBEC3A/RXRA/IRF7/EIF2AK2/PLSCR1	1.431645786
LI.M53 inflammasome receptors and signaling	0.674735269	1.668076438	0.036336724	NFKBIA/PAK1/TNFAIP3/CARD9/RIPK2/BIRC3/NLRP3/RXRA/NLRC4	-0.181549215
LI.M27.0 chemokine cluster (I)	0.570847144	1.534776727	0.036336724	CCL20/CCL4/CCL23/CCL19/CCL2/CXCL2/CXCL3/IFNG/CXCL1/CCL5/CXCL10/CXCL9/PPBP	-0.172386496
LI.S4 Monocyte surface signature	0.449559226	1.348058122	0.03854562	DYSF/FCGR1B/P2RY13/ABCA1/CCR2/SIGLEC9/STEAP4/ASGR1/PYCARD/SLC46A2/ASGR2/LILRB3/LRP1/LTBR/NFAM1/AGTRAP/SIRPB1/TNFRSF10B/MBOAT7/FCAR/C1orf162/MARCO/P2RX1/TREM1/SLC24A4/TNFSF12/MS4A6A/BRI3/LILRB1/CD163/ITGAM/GPER1/SLC11A1/LILRB2/VSTM1/FCGR2A/IL1R2/TMTC2/CD33/PTPRE/CCR1/TMEM71/CLEC12A/ANO10/KCNE3/TLR1/MCTP1	0.676261828
LI.M111.1 viral sensing & immunity; IRF2 targets network (II)	0.68942747	1.677812987	0.039325244	BST2/USP18/CASP1/TNFSF13B/PSMB8/TAP1/PSMB10/ZBP1	2.144791194
