# Supplementary material for: Altered transcriptomic immune responses of maintenance hemodialysis patients to the COVID-19 mRNA vaccine
Source: eLife. 2024 Apr 24;13:e83641. doi: 10.7554/eLife.83641 (PMC11042800; doi:10.7554/eLife.83641)
Supplement: Supplementary file 2. [file elife-83641-supp2.csv]

	enrichmentScore	NES	p.adjust	core_enrichment	Median_MemberGene_WaldStat
LI.M5.1 T cell activation and signaling	0.642241738553196	1.76472037995685	0.0190975493874365	CD3D/TRAC/TRAF3IP3/CD3E/LCK/IL12RB1/CD52/PRKAR1B/BIN2/CD3G/GIMAP6/IL2RG/ZAP70/HLA-DRA/HLA-DRB1/PRKACB/TRAT1	1.77646423847036
LI.M73 enriched in monocytes (III)	0.726159751210181	1.77845409351782	0.0255330477233629	RIN2/BCL6/DUSP6/CCR1/CEBPB/MAML3/HCAR3/TFEC	-1.74343508421477
LI.M235 mitochondrial cluster	0.664598874494389	1.74795011613426	0.0255330477233629	NDUFA8/WDR92/DTD2/TMEM218/TIMMDC1/SMARCAL1/ALDH18A1/EIF2B3/ALG8/POP5/DNAJA3/TCHP/HIBADH	1.94999486833237
LI.M7.0 enriched in T cells (I)	0.496422562519557	1.48702272673743	0.0255330477233629	PTPRCAP/LAT/CD27/CD3D/EOMES/TRBC1/TRAC/SIRPG/NKG7/PRF1/CD3E/LCK/CD28/IL32/SAMD3/SIT1/LEF1/GZMH/GZMA/CD3G/GIMAP6/CCL5/ZAP70/GZMM/GNLY/MAL/RORA/FLT3LG/CD7/TRAT1/UBASH3A/TIGIT/GZMB/SH2D1A/GATA3/ICOS/RASGRP1/XCL2/CD6/CD96	1.40485928836143
