# Supplementary material for: Altered transcriptomic immune responses of maintenance hemodialysis patients to the COVID-19 mRNA vaccine
Source: eLife. 2024 Apr 24;13:e83641. doi: 10.7554/eLife.83641 (PMC11042800; doi:10.7554/eLife.83641)
Supplement: Supplementary file 3. [file elife-83641-supp3.csv]

	enrichmentScore	NES	p.adjust	core_enrichment	Median_MemberGene_WaldStat
LI.M127 type I interferon response	0.985537606	2.498033722	4.58E-09	STAT1/RSAD2/PARP9/TAP1/USP18/IRF7/IFIT1/IFITM1/PLSCR1/HERC5/IFIH1/DDX60	9.538136373
LI.M111.1 viral sensing & immunity; IRF2 targets network (II)	0.983886561	2.456633101	4.58E-09	IFIT2/TAP1/CXCL10/USP18/BST2/PSMB8/PSMB10/TNFSF13B/DDX58/ZBP1/CASP1	8.082916039
LI.M7.2 enriched in NK cells (I)	0.767345	2.33245665	4.58E-09	MYBL1/TGFBR3/FGFBP2/S1PR5/ARL4C/IL2RB/CD96/KLRD1/SAMD3/KLRB1/GIMAP7/CD247/GNLY/KLRF1/RORA/CTSW/TBX21/XCL1/HOPX/PTGDR/IL18RAP/GZMB/PRKCQ/CST7/STAT4/ITK/PRKCH/CLIC3/KLRK1/NKG7/NLRC3/GZMH/SLAMF7/GZMM/GZMA/CCL5/ZAP70/PLEKHF1/KLRC1/FCGR3B/SH2D2A/EOMES/PRF1/FASLG	-3.65356654
LI.M11.0 enriched in monocytes (II)	0.683720884	2.267735927	4.58E-09	TYMP/SLC31A2/MYOF/SECTM1/FCGR1A/NCF1/NCF1C/HSPA6/FCGR1B/MSRB1/IFI30/S100A11/P2RY13/FCGR2A/PRKCD/S100A8/LMO2/IFNGR2/GRN/LILRB2/SPI1/TNFAIP2/LILRA6/CCR1/SERPINA1/ALDH1A1/ASGR2/IGSF6/S100A12/HPSE/TNS3/ASGR1/HCK/S100A9/TLR8/FGL2/SORT1/FCN1/LILRB3/NFE2/FPR2/EPB41L3/HK3/PILRA/LILRA1/LILRB1/CST3/LILRA5/FPR1/MNDA/AIF1/ALOX5/PLXNB2/TLR2/PTAFR/CFD/FCER1G/CD1D/TYROBP/MPEG1/CFP/SCPEP1/SIGLEC9/CYBB/TFEC/ADAP2…	3.75042516
LI.M37.0 immune activation - generic cluster	0.439123115	1.485707453	4.58E-09	DYSF/SMCO4/GPBAR1/TLR7/HLA-DRA/NCF4/P2RY13/PRRG4/CD300C/S100A8/STX11/ALDH1A1/SAMHD1/DUSP6/EMILIN2/NFE2/FPR2/HK3/ARHGEF10L/LILRA5/OSCAR/ANXA5/LRRK2/CSF2RB/SIGLEC9/CTSS/ADAP2/GPR84/RBBP8/ADCY9/SIRPB1/TMEM176A/TMEM176B/BTK/CLEC4D/TLR1/NLRC4/LAT2/CYFIP1/RNASE2/DEFA1/CIITA/HCAR3/MS4A4A/CORO2A/BST1/IL18RAP/GSN/LYZ/OLR1/VANGL1/CRISPLD2/PLA2G7/TLR5/MYO7B/LRG1/CLC/BCL11B/RAB32/STEAP4/VPREB3/LCN2/PLXDC2/LY…	1.289447035
LI.M4.0 cell cycle and transcription	0.432988703	1.465277623	4.58E-09	TYMP/SLC31A2/MYOF/SECTM1/FCGR1A/NCF1/NCF1C/HSPA6/FCGR1B/APOBEC3A/MSRB1/IFI30/S100A11/FCGR2A/PRKCD/LMO2/GRN/LILRB2/SPI1/LRRC25/TNFAIP2/LILRA6/CCR1/SERPINA1/ASGR2/APOBEC3B/IGSF6/S100A12/HPSE/TNS3/ASGR1/HCK/S100A9/TLR8/FGL2/SORT1/FCN1/LILRB3/EPB41L3/PILRA/RMI2/LILRA1/LILRB1/IL1RN/CST3/FPR1/MNDA/AIF1/ALOX5/PLXNB2/TLR2/PTAFR/CFD/FCER1G/CD1D/TYROBP/MPEG1/CFP/SCPEP1/CYBB/TFEC/CD300LF/LMNB1/CD86/CD14/MTM…	1.006998352
LI.S4 Monocyte surface signature	0.564105635	1.799015439	1.63E-08	DYSF/FCGR1B/CCR2/P2RY13/FCGR2A/NFAM1/MARCO/LILRB2/LTBR/CCR1/ASGR2/ASGR1/MBOAT7/LILRB3/FPR2/LILRB1/BRI3/FPR1/PYCARD/TLR2/PTAFR/SIGLEC9/C1orf162/PLXND1/SIRPB1/TLR1/SLC46A2/HCAR3/CD33/SLC16A3/AGTRAP/MS4A6A/TMEM71/TLR5/NRROS/SLC7A7/STEAP4/FCGRT/SPNS1/LRP1/CLEC12A/PTGIR/IL6R/CD163/CD36/CSF3R/SLC24A4/ITGAM/MGAM/TNFSF12/SLC11A1/APCDD1/CYBRD1/MFSD1/FXYD6/S1PR3/KCNE3/P2RY2/CD4/GLIPR1/KCNQ1/TNFRSF1B	3.006276649
LI.M4.3 myeloid cell enriched receptors and transporters	0.710841846	2.067551092	9.20E-08	MYOF/SECTM1/GPBAR1/SIGLEC16/MARCO/LRRC25/CCR1/IGSF6/ASGR1/TLR8/LILRA1/CD1D/MPEG1/CD86/CD14/MTMR11/SLC15A3/CHST15/TLR5/SLC7A7/SLC2A6/SLC24A4/KCTD12/SULF2/MS4A14/SLC8A1	4.455264681
LI.M55 TBA	0.892680176	2.262668788	2.43E-07	PRKCD/SPI1/MBOAT7/GRINA/ZYX/RHOG/DOK3/RARA/LRP1/RASGRP4/PDLIM7/CSF3R	3.510307981
LI.M40 complement and other receptors in DCs	0.882651772	2.277370057	2.71E-07	C1QB/C1QC/HLA-DQB1/TLR8/HLA-DQA1/TYROBP/C1QA/CD86/OLR1/SIRPA/LY96	4.493550675
LI.M61.0 enriched in NK cells (II)	0.838905549	2.248599108	2.71E-07	KIR2DL1/TGFBR3/S1PR5/IL2RB/KIR3DL1/KIR2DS4/CD96/KLRB1/KIR2DL3/CD247/KLRF1/KLRK1/NKG7	-4.684913593
LI.M150 innate antiviral response	0.879708335	2.229789175	7.72E-07	OAS1/OAS3/RSAD2/OASL/TAP1/IRF7/IFIT1/APOBEC3A/PLSCR1/EIF2AK2/SP100/RXRA	9.451187511
LI.M66 TBA	0.804298923	2.155839646	3.38E-06	IDO1/SLC31A2/IFI30/CST3/FCER1G/CYBB/ADAP2/BTK/ALDH2/KYNU/SLC7A7/HMOX1/MAFB/CPVL	3.978900779
LI.M146 MHC-TLR7-TLR8 cluster	0.794509336	2.129599674	4.92E-06	CD74/TLR7/HLA-DRB1/HLA-DRA/HLA-DQB1/HLA-DPA1/HLA-DPB1/TLR8/HLA-DQA1/HLA-F/HLA-B/HLA-C/HLA-A/HLA-G	5.261686873
LI.M118.0 enriched in monocytes (IV)	0.576858979	1.773926234	5.64E-06	DYSF/TNFSF13B/HLA-DMB/LTBR/SAMHD1/PAK1/DUSP6/EMILIN2/ARHGEF10L/SMARCD3/LRRK2/CD68/CTSS/C1orf162/TMEM176B/TLR1/HCAR3/HHEX/LYZ/NAIP/STEAP4/DPYD/LY96/DOK3/PGD/ACSL1/F5/SLC24A4/MGAM/EVI5/MPP1/VNN1/RHOU/FGD4/CARD9/CD4	3.014869589
LI.M5.0 regulation of antigen presentation and immune response	0.517893172	1.647172201	6.68E-06	FCGR1B/MYD88/TLR7/HLA-DMB/HLA-DRB1/HLA-DMA/HLA-DRA/HLA-DQB1/LILRB2/PTPN6/HLA-DPA1/HLA-DPB1/PAK1/DUSP6/HCK/LILRB1/MNDA/HLA-DQA1/TLR2/FCER1G/CD247/CD86/CTSH/BTK/TLR1/PTPN22/CSK/LAT2/FGR/PRKCQ/TLR5/ITK/KLRK1/LY96/VASP/HLA-DOB/PAG1/FYN/HLA-DOA/INPP5D/PTPRC/ZAP70/CLEC7A/SYK/CD24/CD3G/MEF2C/CD4/SLA2/THEMIS/PLCG1/IRAK3/NCKAP1L/LCK/CARD11/CD19/FOS	1.657196392
LI.M165 enriched in activated dendritic cells (II)	0.637779395	1.872910104	7.75E-06	SIGLEC1/IFIT3/IFIT2/RSAD2/PARP9/SERPING1/MX2/IFIT1/HERC5/PRRG4/IFIH1/LAMP3/IFNGR2/CSF2RB/CCL8/IFI27/FAM20C/HESX1/CSF2RA/HLX/RBM47/CXCL11	4.453304794
LI.M4.13 cell junction (GO)	0.847244602	2.115456411	3.20E-05	IFI30/PRKCD/TNS3/PAK1/HCK/EPB41L3/LCP1/CTNNA1/KCTD12/FES/HOMER3	5.393373906
LI.M139 lysosomal/endosomal proteins	0.843820496	2.106906877	3.63E-05	NPC2/SORT1/CD68/CTSB/CTSS/CTSH/PSAP/AP1S2/GAA/CTSD/SLC11A1	4.450790633
LI.M75 antiviral IFN signature	0.693046999	1.946140566	3.92E-05	OAS1/OAS3/RSAD2/PML/SERPING1/CXCL10/IRF7/IFIT1/DHX58/C1QB/HERC5/DDX58/IFIH1/DDX60/RARA/ANXA3/ELANE/BCL3	7.040866897
LI.M11.2 formyl peptide receptor mediated neutrophil response	0.846415652	2.072623324	5.25E-05	SECTM1/NCF1C/FCGR2A/IGSF6/PAK1/PILRA/FPR1/NCF2/CAMK1	5.4063488
LI.M7.0 enriched in T cells (I)	0.520953027	1.61472664	0.000105489	CD96/ETS1/SAMD3/KLRB1/GIMAP7/CD247/GNLY/RORA/XCL1/GZMB/PRKCQ/SIRPG/NELL2/BCL11B/ITK/PRKCH/ITM2A/NKG7/NLRC3/GZMH/FLT3LG/IL7R/GZMM/RASGRP1/GZMA/CCL5/CD6/ZAP70/SIT1/CD28/EOMES/CD3G/PRF1/TIGIT/SLA2/SH2D1A/GIMAP6/CD27/LCK/GZMK/XCL2	-2.035408239
LI.M67 activated dendritic cells	0.78056535	1.9784923	0.000197284	RSAD2/SERPING1/IRF7/C2/PLSCR1/DDX58/C1QC/IFIH1/DDX60/CD38	6.640606784
LI.M61.2 enriched in NK cells (receptor activation)	0.764167425	1.971663193	0.000428289	KIR2DL1/KIR3DL1/CD96/KLRD1/KIR2DL3/CD247/PRKCQ/CD244/ITK/KLRK1/ZAP70/KIR2DL4	-3.755836254
LI.M7.1 T cell activation (I)	0.521661883	1.602099725	0.000460072	TXK/CD247/RORA/PTPN22/IL12RB1/PRKCQ/CORO1A/SIRPG/BCL11B/ITK/PRKCH/KLRK1/NLRC3/SLAMF7/IL7R/RASGRP1/IKZF1/CCL5/ZAP70/SIT1/CD8A/CD28/EOMES/CD3G/CAMK4/ITPR3/TIGIT/SLA2/CD5/THEMIS/TCF7/IL21R/CD27/LCK	-1.741229664
LI.M234 transcription elongation, RNA polymerase II	0.727693852	1.906192308	0.00064116	NDUFA3/MEA1/BOLA2B/UQCR10/AURKAIP1/POLR2L/POLR2E/NDUFB10/UQCRQ/NDUFB11/POLR2J/MIF	2.886998662
LI.M111.0 viral sensing & immunity; IRF2 targets network (I)	0.697780653	1.890788759	0.00064116	IFI35/TAP1/USP18/BST2/PSMB8/TNFSF13B/TLR7/ZBP1/AIF1/CTSS/KYNU/THBS1/FES/LY86	5.039747637
LI.M81 enriched in myeloid cells and monocytes	0.565697893	1.664439993	0.00064116	CCR2/TLR7/FCER1G/CD14/HHEX/MARCKS/THBS1/PRAM1/F5/CSF1R/SELP/PCSK6/ACTN1/PDGFA/CHI3L1/NLRP3/ITGA2B/SLC8A1/EGF/MMRN1/CLU/SNCA/ITGB3/SPARC/PTGS1/FKBP1B/LIN7A/CLEC5A/BCL6	2.201449567
LI.M37.1 enriched in neutrophils (I)	0.51424018	1.574834645	0.00121583	MSRB1/NCF4/FFAR2/FCGR2A/NFE2/FPR2/FPR1/PTAFR/GLT1D1/HCAR3/LRG1/STEAP4/ST6GALNAC2/PFKFB4/CSF3R/MGAM/RNF24/CDA/PYGL/TNFRSF10C/CHI3L1/ORM1/PROK2/NLRP12/FCGR3B/LRRC4/CREB5/S100P/SLC22A4/CYP4F3/MXD1/REPS2/DGAT2/BASP1/G0S2/LIN7A/CMTM2/KCNJ15	2.03811074
LI.M174 TBA	0.620107077	1.749900883	0.001365809	BZW1/MATR3/SACM1L/RNF6/CCNC/ZBTB11/PCNP/PANK3/TSN/ANP32E/CUL5/BMI1/ZBED5/AP5M1/RNF138/TNFAIP8/MORF4L2/MDFIC	-2.418182103
LI.M95.0 enriched in antigen presentation (II)	0.631005649	1.760726008	0.001556782	HLA-DRB1/HLA-DMA/HLA-DRA/HLA-DRB5/HLA-DPB1/FGL2/AIF1/CD53/ITGA4/IRF8/HCLS1/ITGAM/PTPRC/IL10RA/ITGB2/SLA	2.295614345
LI.M4.15 enriched in monocytes (I)	0.756706624	1.889395195	0.001669613	SLC31A2/HCK/EPB41L3/RTN1/TNFSF13/DPYSL2/FES/LGALS1/MYCL/APLP2	3.439964072
LI.M32.0 platelet activation (I)	0.615251045	1.727682277	0.001669613	NUCB1/ZYX/GNB2/GNAI2/CORO1A/POR/PFN1/CCDC22/TLN1/TGFB1/ABHD17A/PPP2R1A/APEH/PPP1CA/HGS	2.577574885
LI.M27.0 chemokine cluster (I)	0.596343341	1.693841718	0.003124846	CXCL10/CCL2/CXCL9/CCL8/XCL1/PF4/CXCL11/CCL5/PPBP/CCL4/CXCL5/CCL1/CXCL3/CXCL2/CXCL1	0.004491434
LI.M95.1 enriched in antigen presentation (III)	0.715480446	1.846043702	0.003358961	HLA-DMB/HLA-DRB1/HLA-DMA/HLA-DRA/HLA-DRB5/AIF1/CD53/PTPRC/LAPTM5/ITGB2/ICAM1	3.90520798
LI.M140 extracellular matrix, complement	0.709303628	1.830106612	0.003768413	FCN1/CFP/LAMA2/CRISPLD2/TIMP2/LTBP2/MMP8/CRISP3/SLPI/IGFBP7	2.072957339
LI.M132 recruitment of neutrophils	0.732850198	1.829828891	0.003768413	FFAR2/FPR2/FPR1/PTAFR/HCAR3/F2RL1/CCR3/GNG10/PROK2	3.1263934
LI.M71 enriched in antigen presentation (I)	0.651104978	1.745219203	0.003768413	CD74/HLA-DRB1/HLA-DRA/HLA-DQB1/HLA-DPA1/HLA-DPB1/HLA-DQA1/RTN1/FAR2/HMOX1	4.120315675
LI.M213 regulation of transcription, transcription factors	0.612580988	1.685796714	0.003768413	BTAF1/CCNT2/ZDHHC17/VCPKMT/SREK1/CLK4/BDP1/PTBP2/MED23/CREBZF/STAG2/ARID4B/KIAA1109/CLK1	-2.265534853
LI.M47.2 enriched in B cells (III)	0.577402209	1.648562978	0.003768413	HLA-DQA1/ALOX5/PNOC/BTK/CD180/HHEX/VPREB3/HLA-DOA/IGHD/FCRL3/CD24/FCGR2B/IGHA1/MEF2C/FCRL5/FCRLA/IGKC/TPD52/CDK14	2.050208188
LI.M18 T cell differentiation via ITK and PKC	0.728569127	1.819139628	0.003947621	ETS1/SPOCK2/PRKCQ/SIRPG/ITK/PRKCH/ITM2A/ABLIM1/BCL2/FASLG/SH2D1A	-3.364663795
LI.M128 TBA	0.68308805	1.731417423	0.006671158	SP3/CCNT2/RNF6/CCNC/SREK1/ARID4A/NDUFA5/PIK3C2A/CLK1/RNF139/USP1	-2.381399019
LI.M209 lysosome	0.718508437	1.759416121	0.006880645	GM2A/CTSZ/SORT1/CTSL/CD68/CTSB/PSAP	4.703562467
LI.S10 Resting dendritic cell surface signature	0.442573842	1.398235806	0.007224273	SLAMF8/HLA-DMA/HLA-DQB1/P2RY6/SLC27A3/IGSF6/PLXND1/CD86/PSEN2/TMEM51/CRIM1/SERINC5/SPINT2/PLD3/PLXDC2/FZD5/CD1E/SUCNR1/CD151/FZD1/STAB1/LPCAT2/CD9/CSF1R/JAG1/SLC26A11/SFXN3/CH25H/DENND1B/CLEC10A/MFSD1/TTYH3/IL1R1/CLDN23/LHFPL2/KMO/ABCC3/TACSTD2/IFNGR1	0.976719021
LI.M118.1 enriched in monocytes (surface)	0.651889288	1.707622435	0.007568224	TNFSF13B/HLA-DMB/NFAM1/LTBR/C1orf162/TMEM176B/SLC16A3/STEAP4/SLC24A4/S1PR3/CD4/TNFRSF1B	3.693239358
LI.M117 cell adhesion (GO)	0.582180522	1.624486861	0.007784133	CD96/SPOCK2/PRKCQ/CORO1A/NELL2/NINJ1/SELPLG/PPP2R1A/CYTIP/CD6/PTPRC/ZAP70/BCL2/CD300A/PSTPIP1/PLEK	-0.460828332
LI.M112.0 complement activation (I)	0.632476864	1.678102371	0.009855028	SERPING1/C2/C1QB/C1QC/CFB/CFD/C1QA	2.746676965
LI.M49 transcription regulation in cell development	0.485503084	1.475757184	0.01066374	PAK1/LILRB1/PLXNB2/TYROBP/LST1/CEBPA/SEMA4A/GSN/TIMP2/CDH1/HBZ/SOD2/KLF4/VCAN/RXRA/FES/MSH2/SPTA1/GATA1/EPB42/SPTB/STMN1/KLF1/PLCG1/TYMS/ANK1/FHL2/ECT2/TRIP13/ARHGEF12/BASP1	1.597619345
LI.M219 respiratory electron transport chain (mitochondrion)	0.602761792	1.633314446	0.015442006	COX6B1/COX7B/COX6A1/COX8A/COX5B/UQCR10/CYC1/UQCRQ/UQCRC1/COX5A	2.678072058
LI.M64 enriched in activated dendritic cells/monocytes	0.615390814	1.632769263	0.015442006	SLC31A2/TNFAIP2/IL1RN/DRAM1/SLC15A3/MARCKS/SIRPA/ANPEP/NINJ1/SOD2/IL13RA1/CXCL1/BASP1/G0S2/IL1B	3.261032137
LI.M27.1 chemokine cluster (II)	0.613445563	1.627608078	0.015442006	CXCL10/CCL2/CCR1/CXCL9/XCL1/CXCL11/CCL5/CCL4/CCR5/CXCL5	1.269239573
LI.M72.0 TBA	0.558938466	1.577287135	0.015442006	BZW1/ATP11B/ORC4/SACM1L/RNF6/ZBTB11/PANK3/PHTF2/AP5M1/RNF138/ARID4B/MICU2/PTPN11/RAP2C	-1.914514439
LI.M87 transmembrane transport (I)	0.558356102	1.575643743	0.015442006	SLC31A2/HK3/TLR2/VDR/SLC15A3/SLC7A7/ATP1B2/HMOX1/CDH1/CD36/SLC4A1/SLC11A1/NLRP3/SLC14A1/AQP9	2.470314429
LI.M2.1 extracellular matrix (II)	0.491715396	1.47302271	0.015442006	GRN/LILRB2/TNFAIP2/FGL2/CST3/COL6A2/CTSH/TNFSF13/PLA2G7/LRG1/COL5A1/MPO/ENTPD1/VCAN/COL1A1/CEACAM8/CRISP3/COL5A2/RETN/ORM1/TGFBI/SPARC/OLFM4/CHIT1/CXCL1/ARG1/CTSG/AEBP1/HTRA1	1.520255336
LI.M79 TBA	0.679113797	1.662950219	0.016297062	TFEC/FAM20C/DPYD/ANPEP/MGAM/SULF2/AQP9/RNASE4/CXCL3/TBXAS1	2.452366648
LI.M216 respiratory electron transport chain (mitochondrion)	0.668848119	1.63781259	0.020412007	NDUFS6/COX7B/COX6A1/UQCR10/NDUFB10/NDUFA7/NDUFB7	2.71630315
LI.M43.1 myeloid, dendritic cell activation via NFkB (II)	0.617926855	1.618657923	0.020412007	PRKCD/IL1RN/FUT7/RELB/CCL5/IL23A/BCL3/LTB/NFKB2/ICAM1	2.203964782
LI.M51 cell adhesion	0.51581763	1.50030462	0.020412007	GP9/PARVB/THBS1/COL5A1/SLAMF7/ESAM/SELP/COL1A1/CHL1/MGP/ITGA2B/ITGB5/GP1BA/JAM3/MMRN1/TPM1/ALOX12	0.998540223
LI.S11 Activated (LPS) dendritic cell surface signature	0.499101197	1.481211451	0.020412007	SIGLEC1/IFI6/SLC31A2/TNFSF13B/TMEM140/PRRG4/CD40/CD274/IL3RA/CSF2RB/IFI27/TMCC3/TGFA/PDCD1LG2/NINJ1/SLC43A2/IL13RA1/COLEC12/SLC41A2/F11R/EREG	1.016347695
LI.S5 DC surface signature	0.416803287	1.325653291	0.020412007	SIGLEC1/SLAMF8/PRRG4/HLA-DQB1/P2RY6/MSR1/CD274/HLA-DQA1/GRINA/CSF2RB/PSEN2/TMEM51/CRIM1/TSPAN33/MFSD12/OLR1/SPINT2/ATP1B2/TGFA/FZD5/PDCD1LG2/CD1E/SUCNR1/CD151/CD9/AGPAT3/TM2D2/JAG1/TFRC/TNFRSF11A/DENND1B/RAMP1/IL1R1/CLDN23/LHFPL2/KMO/ABCC3/TACSTD2/COLEC12/SLC41A2/SLC6A6/SLC1A3/TMEM158/NRP2/ITPRIPL2/SRD5A3/LRP11/CD1A/SLC36A1/SLC7A8/FPR3/CXCL16/GPR137B/CALCRL	0.926342619
LI.M153 TBA	0.59907983	1.605771202	0.020559259	SP3/RANBP6/C2orf69/RNF6/CCNC/AEBP2/NRAS/PHTF2/SGTB/TCF12/PIK3C2A/SEC23A/RAP2C/TVP23B/C1D	-2.478195204
LI.M136 TBA	0.592213546	1.58736684	0.023386883	NAPA/NUCB1/PNPLA6/GNB2/COPE/GNAI2/CAPN1/ABHD17A/CTSD/PPP2R1A/DNM2/MAP2K2/GBF1/GPS1	2.815060172
LI.M30 cell movement, Adhesion & Platelet activation	0.555977312	1.530025814	0.024386504	COL5A1/CD9/ESAM/SELP/NAV1/PDGFA/GP6/MPP1/TPM1/ALOX12/TNS1/ITGB3	1.781234583
LI.M242 TBA	0.65509797	1.635691981	0.027180522	RASA2/REL/STRN3/DYRK1A/FBXW7/MAP3K2/MED1/ACAP2/CREBBP	-2.637639916
LI.M204.1 chaperonin mediated protein folding (II)	0.65982853	1.615726266	0.027382096	CCT6A/CCT5/CCT3/CCT7/CCT8/PFDN5	2.268129014
LI.M32.6 TBA	0.634157502	1.636218666	0.028543798	NUCB1/TGFB1/PPP2R1A/DNM2/HGS/AP2M1/HMG20B/CPNE1/CDC37/MLF2	2.153777566
LI.M211 TBA	0.655782547	1.605818842	0.028543798	CMPK1/RAP1B/ADD3/SLC25A46/CCNG1/BMI1/MDFIC	-2.456519124
LI.M44 T cell signaling and costimulation	0.655645756	1.60548388	0.028543798	IFI30/LCP1/CD37/IL7R/FYN/IL23A/ARHGDIB/TCF7/LCK	-0.520910932
LI.M7.4 T cell activation (III)	0.599941333	1.571544891	0.028543798	CD96/KLF12/ETS1/ZMYND11/RORA/PRKCQ/NELL2/RASGRP1/CAMK4/THEMIS/LCK	-3.376985751
LI.M77 collagen, TGFB family et al	0.492042772	1.433699728	0.034783274	FZD8/COL6A2/VDR/CAMK1/BCL11B/PDGFRB/CD9/TGFB1I1/ADM/COL5A2/JUP/JAM3/CD24/MEF2C	0.05890562
LI.M7.3 T cell activation (II)	0.49798267	1.442644448	0.034868598	CD247/IL12RB1/SIRPG/IL18R1/STAT4/ITK/SP140/NKG7/NLRC3/SLAMF7/GZMA/CCL5/PTPN7/ZAP70/CD3G/TIGIT/SLA2/CCR5/LCK/SLAMF1/CD3D	-1.472075165
LI.M243 TBA	0.606493977	1.537275085	0.035024904	PRELID1/PSMB3/DDT/BCAP31/TBCB/SRM/APRT/NDUFB7/SCAND1/TUFM/NDUFB9/TMEM160	2.760105722
LI.M198 TBA	0.639820484	1.597546142	0.036531904	TSEN34/LST1/CCNJL/CPPED1/PDLIM7/XPO6/PISD/CEBPB	2.718540654
LI.M163 enriched in neutrophils (II)	0.622971496	1.607357144	0.036554193	HSPA6/MBOAT7/BEST1/CFD/TYROBP/TSPAN2/NPL/IMPA2/FRAT2	2.463125401
LI.M83 enriched in naive and memory B cells	0.634593947	1.553934183	0.04257477	CD37/LY86/NR3C2/FCGR2B/MEF2C/BANK1/PKIG	1.778455421
LI.M109 receptors, cell migration	0.571976724	1.517581988	0.04316146	CCR2/TGFBR3/CCR1/LRRK2/CORO1A/IL6R/S1PR1/C3AR1/BCL2	1.467927374
LI.M45 leukocyte activation and migration	0.631670913	1.577197753	0.044801415	PTPN6/FCER1G/ITGA4/SIRPG/SELPLG/FYN/INPP5D/CD48	0.387595971
LI.M11.1 blood coagulation	0.52043581	1.452197563	0.048025826	SERPINA1/GNB4/CFD/FCER1G/PSAP/SLC16A3/SIRPA/SLC7A7/CD36/F5/ITGAM/SYK/F13A1/DOK2/PECAM1/P2RX1/LYN	2.327931843
