# Supplementary material for: Altered transcriptomic immune responses of maintenance hemodialysis patients to the COVID-19 mRNA vaccine
Source: eLife. 2024 Apr 24;13:e83641. doi: 10.7554/eLife.83641 (PMC11042800; doi:10.7554/eLife.83641)
Supplement: Supplementary file 4. [file elife-83641-supp4.csv]

	enrichmentScore	NES	p.adjust	core_enrichment	Median_MemberGene_WaldStat
LI.M156.1 plasma cells, immunoglobulins	0.80235661947086	2.14199283136005	2.73425557956786e-07	IGHG1/IGKC/TNFRSF17/IGLL5/TXNDC5/IGLV2-23/IGKV1D-13/IGKV4-1/IGKV1-5/PNOC/IGKV3-20/IGLV3-19/IGLV1-44/IGHV3-48/IGHA1/POU2AF1/DERL3/CD27	3.2163445452716
LI.M4.1 cell cycle (I)	0.4990641627258	1.54116480032722	3.40884393899033e-06	CDK1/CCNA2/TYMS/CDC20/UBE2C/CCNB2/MCM10/KIF11/KIFC1/TPX2/MYBL2/ASPM/PLK1/TOP2A/CENPF/PBK/CDC6/NCAPG/KIF20A/PTTG1/SPAG5/UHRF1/AURKB/RRM2/STMN1/CDKN3/CDC25C/CDC45/SPDL1/CEP55/RAD54L/MND1/SPC25/CHAF1B/BIRC5/OIP5/GMNN/CDCA5/CENPE/MELK/CDT1/SKA3/PCNA/POLE2/E2F8/FOXM1/NCAPD3/CDC25A/CKS2/CENPM/MCM6/DLGAP5/KIF18B/RANBP1/SPC24/TRIP13/ESPL1/CDCA8/MAD2L1/NUSAP1/E2F2/FBXO5/RFC4/CDCA3/CKS1B/FANCD2/DTYMK/CENPN…	1.34738394364666
LI.M219 respiratory electron transport chain (mitochondrion)	0.722136151623206	1.85186995843382	0.00220182777384251	UQCR10/COX6B1/COX7B/COX5A/COX6C/UQCRQ/UQCRC2/UQCRB/UQCRFS1/COX7C/COX5B/COX7A2L/COX8A/UQCRH	1.66620244701835
LI.M156.0 plasma cells & B cells, immunoglobulins	0.60242228931666	1.66365691094011	0.00356926008467687	IGHG1/IGKC/TNFRSF17/IGLL5/IGLV2-23/IGKV1D-13/ITM2C/IGKV4-1/IGKV3-20/IGLV3-19/IGLV1-44/VPREB3/E2F5/P2RX5/CD52/FCRL1/IGHD/ADAM28/OSBPL10	1.28795261025044
LI.M10.0 E2F1 targets (Q3)	0.604442131060669	1.66185652182164	0.00680298725309445	CDC6/STMN1/GMNN/MELK/PCNA/POLE2/MCM6/NR3C2/TLE4/ARID4A/RANBP1/FBXO5/HOXA9/UNG/HMGA1/SRSF1/EZH2/RAD51/DCK/E2F7	1.2669601143076
LI.M4.5 mitotic cell cycle in stimulated CD4 T cells	0.575838512636686	1.59902103542887	0.00950834639331447	CDK1/TYMS/CDC20/KIF11/TOP2A/KIF20A/UHRF1/RRM2/UBE2T/CEP55/CDCA5/MELK/CENPM/ZEB1/RNF144A/MCM6/LAG3/MAD2L1/FBXO5/CHAC2/DEPDC1B/CXCR6/NUF2/CENPK/CDCA7	1.63347389474447
LI.M29 proinflammatory cytokines and chemokines	0.743465906615054	1.74505577319181	0.0349720735769324	IL1A/IL1B/PTX3/CCL3/IL6/CCL3L3/TNF	-1.92372994603526
LI.M4.2 PLK1 signaling events	0.551659396560197	1.53187909480501	0.0349720735769324	CDC20/TPX2/MYBL2/ASPM/PLK1/CKAP2L/NCAPG/KIF20A/CLSPN/CDC25C/CEP55/SPC25/CENPE/TRIP13/ESPL1/NUSAP1/FBXO5/KIF14/KIF23/AURKA/HJURP/CENPU/TUBG1	1.63347389474447
LI.M4.7 mitotic cell cycle	0.615710336486349	1.60900254177238	0.0391701826592351	CDK1/CCNA2/CCNB2/PLK1/CDC25C/CEP72/PKMYT1/CDT1/E2F8/FOXM1/CDC25A/CCNB1/CEP76/PLK4/NEK2/TUBG1	1.78283099701791
