# Supplementary material for: Altered transcriptomic immune responses of maintenance hemodialysis patients to the COVID-19 mRNA vaccine
Source: eLife. 2024 Apr 24;13:e83641. doi: 10.7554/eLife.83641 (PMC11042800; doi:10.7554/eLife.83641)
Supplement: Supplementary file 5. [file elife-83641-supp5.csv]

	enrichmentScore	NES	p.adjust	core_enrichment	Median_MemberGene_WaldStat
LI.M127 type I interferon response	0.908600201409869	2.12637187778724	3.0751137889495e-06	PARP9/STAT1/RSAD2/IFIT1/USP18/IRF7/HERC5/TAP1/DDX60/IFIH1/IFITM1/PLSCR1	2.32476438639881
LI.M150 innate antiviral response	0.867221560332773	2.02953459050637	0.000112150595818797	RSAD2/IFIT1/OAS3/OAS1/EIF2AK2/IRF7/OASL/TAP1/APOBEC3A/SP100/PLSCR1	2.40109021382017
LI.M75 antiviral IFN signature	0.752689156606728	1.90794877233876	0.000219779848394875	SERPING1/RSAD2/IFIT1/OAS3/ELANE/OAS1/C1QB/IRF7/HERC5/DHX58/DDX60/FCER1A/IFIH1/PML/DDX58/CXCL10	1.51504649503314
LI.M67 activated dendritic cells	0.835176802550151	1.95454113169605	0.000523594787424317	SERPING1/RSAD2/C1QC/IRF7/DDX60/IFIH1/C2/PLSCR1/CD38/DDX58	1.58021794506302
LI.M4.0 cell cycle and transcription	0.41961712193549	1.26727745151167	0.00437407693732378	CDCA8/PADI4/CEACAM8/TYMP/EZH2/CHEK1/CENPF/FCGR1A/RACGAP1/CENPI/DONSON/TK1/SLC31A2/TOP2A/GMNN/AURKB/WDR76/APOBEC3A/PCNA/MYOF/LMNB1/KIFC1/MYBL2/SECTM1/SPAG5/UBE2T/CENPA/NLRP12/POLQ/GINS4/NUSAP1/MIS18A/TRIP13/SKA3/CEP55/UHRF1/GINS1/WDHD1/CD163/MCM6/PGLYRP1/ASF1B/LRR1/EPB41L3/CCDC34/HSPA6/KIF18A/PBK/ESPL1/DLGAP5/CDT1/STMN1/MARCKS/NUF2/TROAP/CDC25C/MCM2/BRIP1/SPDL1/CENPN/FCGR1B/FANCD2/SKA1/GPSM2/ZNF36…	0.382819954094072
LI.M111.1 viral sensing & immunity; IRF2 targets network (II)	0.779288848817575	1.79814276058397	0.0115549983790511	USP18/IFIT2/TAP1/TNFSF13B/PSMB8/BST2/ZBP1/DDX58/CXCL10/PSMB10	1.68921867616946
LI.M4.1 cell cycle (I)	0.454826472323018	1.33069218810952	0.0119050167938785	CDCA8/CHEK1/CENPF/RACGAP1/CENPI/TOP2A/GMNN/AURKB/PCNA/KIFC1/MYBL2/SPAG5/CENPA/GINS4/NUSAP1/TRIP13/SKA3/CEP55/UHRF1/GINS1/MCM6/KIF18A/PBK/ESPL1/DLGAP5/CDT1/STMN1/NUF2/CDC25C/MCM2/BRIP1/SPDL1/CENPN/FANCD2/SKA1/GPSM2/CDC45/E2F7/CCNB1/SUV39H2/DTL/KIF20B/MKI67/CENPW/DHFR/CHAF1B/TYMS/CCNA2/GINS2/OIP5/BUB1B/KIF15/TIMELESS/NEK2/HELLS/KIF2C/ZWINT/RRM2/SMC4/AURKA/E2F8/FOXM1/CKS1B/TUBG1/KIF23/UBE2C/KIF20A/K…	0.628077693330761
LI.M46 cell division stimulated CD4+ T cells	0.612806356382189	1.58008815184717	0.020621828531522	ACTN1/TOP2A/SLC27A2/UHRF1/GINS1/CDT1/DHCR24/GNB4/CDC45/DTL/TYMS/ZWINT/RRM2/ZNRF1/KIF20A	0.36223527128172
LI.M121 TBA	0.728860238181529	1.70573142169863	0.030860471478228	TAP1/CCL19/LY9/PLSCR1/SLAMF7/IL15	-0.00249752131843463
LI.M111.0 viral sensing & immunity; IRF2 targets network (I)	0.648990238608811	1.59349321725079	0.030860471478228	USP18/IFI35/TAP1/TNFSF13B/PSMB8/BST2/ZBP1/TLR7	0.677467089226642
LI.M165 enriched in activated dendritic cells (II)	0.565379529913259	1.50094448404612	0.0360685189958831	SIGLEC1/SERPING1/PARP9/IFIT3/RSAD2/IFIT1/MX2/IFIT2/LAMP3/HERC5/IFIH1/ATF3/CCL20/IFI27/CXCL11/CSF2RB/PDGFC/BCL2A1/IL18/DOCK4/DSE/HESX1/RBM47/ST3GAL6	0.700228390603149
LI.M37.0 immune activation - generic cluster	0.400580278085769	1.20851790734459	0.0360685189958831	ELANE/LTF/MMP8/ENG/ZNF608/CD9/CAMP/DEFA4/CMTM2/ARG1/BPI/ACTN1/CCDC150/PSD3/PAX5/OLFM4/SLPI/FOLR3/IL1R2/MGAM/PRTFDC1/BRCA2/INHBA/RAD54B/GRAP2/LPCAT2/CTSG/RETN/SLC27A2/CHIT1/LRP12/AZU1/CD1B/F13A1/PCBP3/TLR7/CAMK4/RUNX2/PRG2/ICOSLG/CHI3L1/CD19/DOCK5/LCN2/PKMYT1/PADI2/DHCR24/MCTP1/OLR1/NFE2/CR1/HLA-DOA/ENTPD1/ABCA13/STX11/ROPN1L/FGD4/RAD51C/PRTN3/ORC6/CD177/CENPL/PYGL/SERPINB10/CEACAM6/CSF2RB/MYCL/NR…	-0.205205795616017
