# Supplementary material for: Altered transcriptomic immune responses of maintenance hemodialysis patients to the COVID-19 mRNA vaccine
Source: eLife. 2024 Apr 24;13:e83641. doi: 10.7554/eLife.83641 (PMC11042800; doi:10.7554/eLife.83641)
Supplement: Supplementary file 6. [file elife-83641-supp6.csv]

	enrichmentScore	NES	p.adjust	core_enrichment	Median_MemberGene_WaldStat
LI.M37.1 enriched in neutrophils (I)	0.729594038	2.04984336	7.88E-09	VNN2/FCGR3B/CYP4F3/MANSC1/FFAR2/MME/HCAR3/LRG1/CMTM2/CXCR1/CHI3L1/S100P/FPR2/CSF3R/ALPL/BASP1/FPR1/CREB5/TREM1/CDA/PTAFR/KRT23/PYGL/VNN3/PROK2/MGAM/RGL4/DGAT2/GLT1D1/TNFRSF10C/LIN7A/ORM1/C5AR1/MSRB1/KCNJ15/FCGR2A/PFKFB4/G0S2/NCF4/STEAP4/REPS2/MXD1	1.813359628
LI.M11.0 enriched in monocytes (II)	0.560322026	1.709690513	7.88E-09	VNN2/FPR2/TNFSF12-TNFSF13/CSF3R/CHST15/QPCT/FPR1/S100A11/AQP9/TREM1/IMPA2/CDA/PTAFR/PYGL/GCA/S100A8/VNN3/CLEC7A/S100A9/NCF2/FXYD6/RBP7/FCER1G/GLT1D1/SIGLEC9/SIRPB1/FBP1/TYROBP/SLC11A1/FCGR1A/PILRA/CLEC4A/PADI2/S100A12/ANPEP/TLR2/MNDA/HPSE/PRKCD/SLC15A3/KLF4/PLA2G7/LILRA6/C5AR1/IFI30/AOAH/CEBPD/MSRB1/CD86/MEGF9/CFP/IGSF6/LAT2/SLC31A2/PLBD1/CSTA/TIMP2/CPPED1/FCGR2A/CLEC4E/HSPA6/CD93/BST1/LY86/P2RY1…	1.149751071
LI.M4.0 cell cycle and transcription	0.482855106	1.49835855	7.88E-09	AURKB/CCNB1/SUV39H2/UBE2C/CDCA8/CENPF/KIFC1/KIF20A/CENPI/PLK1/TK1/TNFSF12-TNFSF13/CSF3R/CHST15/SKA3/CDC20/CEP55/FPR1/S100A11/DEPDC1B/PTAFR/KIF23/GCA/CLEC7A/S100A9/NCF2/PBK/FXYD6/FCER1G/LMNB1/GLT1D1/GMNN/FANCD2/TYROBP/SLC11A1/FCGR1A/PILRA/CLEC4A/MYBL2/EXO1/S100A12/PGLYRP1/ASPM/TLR2/MNDA/HPSE/PRKCD/SLC15A3/KLF4/UHRF1/LILRA6/MKI67/HJURP/C5AR1/IFI30/AOAH/CCNA2/OIP5/CEBPD/MSRB1/PCNA/RAD51AP1/LRR1/E2F7…	0.849957036
LI.M37.0 immune activation - generic cluster	0.463455271	1.436985698	7.88E-09	MMP9/VNN2/INHBA/FCGR3B/CYP4F3/MANSC1/PAX5/HCAR3/GRAP2/CD177/LRG1/CMTM2/RFC2/CXCR2/CHI3L1/S100P/CRISP3/DEFA1/RAD54B/CA4/FPR2/BASP1/DYSF/QPCT/CREB5/PSD3/AQP9/TREM1/IMPA2/CDA/LY96/PYGL/DOCK5/S100A8/PROK2/MGAM/RGL4/RBP7/DHCR24/NME8/SIGLEC9/NLRC4/FCGR2C/SIRPB1/RNASE6/LPCAT2/FBP1/CAMP/CLEC5A/LIN7A/SLPI/IL1R1/CEACAM1/PTX3/NAV1/MCTP1/PADI2/BEX1/ANPEP/FGD4/VNN1/ORM1/CXCL1/PLA2G7/IL1R2/SLC22A15/BANK1/ELOVL…	0.562615792
LI.S4 Monocyte surface signature	0.557283902	1.632822772	2.81E-06	VNN2/GPER1/HCAR3/MBOAT7/FPR2/CSF3R/DYSF/FPR1/TREM1/PTAFR/ANO10/MGAM/FXYD6/SIGLEC9/SIRPB1/SLC11A1/MCTP1/TLR2/NFAM1/IL1R2/C5AR1/FCGR2A/CD93/P2RY13/FCGR1B/PTGIR/ITGAM/C1orf162/TMEM154/IL6R/MARCO/LILRB3/STEAP4/S1PR3/CD33/AGTRAP/TLR4/SLC7A7/TLR1/FCAR/CCR1/FCGRT/SLC16A3/CCR2/KCNE3/APCDD1/BRI3/MS4A6A/CD302/PYCARD/TMEM71/SLC24A4/LILRB2/TNFRSF1B/LRP1/GLIPR1/SLC46A2/CLEC12B/CD163/ASGR2	1.031673884
LI.M132 recruitment of neutrophils	0.861734747	2.011916097	6.34E-05	FFAR2/HCAR3/CXCR1/FPR2/GNG10/FPR1/PTAFR/PROK2/C5AR1	2.040205732
LI.M156.1 plasma cells, immunoglobulins	0.691803979	1.802858311	0.000420002	IGHG1/TNFRSF17/IGKV1-5/IGLV1-44/IGKC/IGKV3-20/IGLL5/IGLV2-23/DERL3/TXNDC5/IGLV3-19/IGHA1/IGKV4-1	1.409451525
LI.M118.0 enriched in monocytes (IV)	0.526476509	1.486293124	0.01204421	HCAR3/CXCR2/DYSF/LY96/DOCK5/MGAM/RNASE6/PTX3/FGD4/VNN1/IL1R2/PTGS2/LRRK2/PGD/C1orf162/TNFSF13B/MPP1/STEAP4/TLR1/CTSS/ACSL1/CD68/BCL6/DOK3/EMILIN2/NACC2/LYZ/SMARCD3/SLC24A4/EVI5/TNFRSF1B/TMEM176B	0.925515088
LI.M11.1 blood coagulation	0.639639341	1.644583372	0.01331635	SERPINB2/TREM1/FCER1G/SIRPA/PSAP/PLAUR/ITGAM/SERPINA1/F13A1/CFD/SLC7A7/SLC16A3/DOK2/ITGAX	1.071100943
LI.M7.4 T cell activation (III)	0.710003637	1.72353426	0.014222264	NELL2/ATP8B2/CAMK4/LEF1/RORA/GLYR1/ETS1/CD96/PRKCQ/KLF12/RASGRP1	-1.26623134
LI.M11.2 formyl peptide receptor mediated neutrophil response	0.743919365	1.703957437	0.016812454	FPR1/NCF2/SLC11A1/PILRA/IGSF6/FCGR2A/NCF1C/SECTM1	1.414205031
LI.M163 enriched in neutrophils (II)	0.700521595	1.678177711	0.021806649	MBOAT7/IMPA2/FRAT2/TYROBP/ARAP3/BTNL8/BEST1/HSPA6/CFD/TSPAN2/DENND3	1.370759266
LI.M4.3 myeloid cell enriched receptors and transporters	0.564598267	1.51466681	0.021806649	CHST15/RNASE6/CLEC4A/SLC15A3/CD86/IGSF6/GPBAR1/TLR8/CD14/MPEG1/MARCO/SULF2/SLC7A7/CCR1/SECTM1/SIGLEC7/SLC24A4/CD1D/LRRC25/SLC1A3/KCTD12/LILRA1	1.08511717
LI.M219 respiratory electron transport chain (mitochondrion)	0.656756063	1.645553928	0.02203188	COX8A/COX6B1/UQCRQ/COX5B/COX5A/COX6A1/UQCRC2/UQCRFS1/UQCRH/UQCRC1/COX7B/CYC1/COX7C/UQCR10	1.151240835
LI.M81 enriched in myeloid cells and monocytes	0.532059181	1.45239803	0.023571136	CHI3L1/FCER1G/EGF/CLEC5A/LIN7A/ITGB3/SELP/TF/CD14/PCSK6/TLR4/PTGS1/SPARC/CLU/MMRN1/CSF1R/BCL6/CCR2/PROS1/MARCKS/PDGFA	0.107069227
LI.M136 TBA	0.652675	1.619293202	0.02499123	CTSD/PPP2R1A/GNAI2/GNB2/PNPLA6/MAP2K2/NUCB1/PKN1/GPS1/COPE/NAPA/ABHD17A/GBF1/CAPN1	1.05967484
LI.M64 enriched in activated dendritic cells/monocytes	0.66337378	1.620587858	0.037392638	BASP1/ANPEP/SLC15A3/CXCL1/IL1B/SLC31A2/IL1RN/SIRPA/G0S2/SOD2/MARCKS/NINJ1/TNFAIP2/DRAM1	1.324180851
LI.M44 T cell signaling and costimulation	0.699195379	1.601516538	0.049061779	LCP1/IFI30/TCF7/ARHGDIB/MAPK14/IL7R	0.201776503
LI.M156.0 plasma cells & B cells, immunoglobulins	0.53415109	1.435700915	0.049140959	IGHG1/TNFRSF17/ADAM28/PCDH9/IGLV1-44/IGKC/IGKV3-20/IGLL5/IGLV2-23/IGLV3-19/BLK/IGKV4-1/ABCB4/FCRL2	0.123536475
