# Supplementary material for: Altered transcriptomic immune responses of maintenance hemodialysis patients to the COVID-19 mRNA vaccine
Source: eLife. 2024 Apr 24;13:e83641. doi: 10.7554/eLife.83641 (PMC11042800; doi:10.7554/eLife.83641)
Supplement: Supplementary file 7. [file elife-83641-supp7.csv]

	enrichmentScore	NES	p.adjust	core_enrichment	Median_MemberGene_WaldStat
LI.M4.0 cell cycle and transcription	0.473197774	1.436994963	2.75E-08	IL1RN/TYMS/UHRF1/CDCA2/CCR1/KIF18B/MYOF/HJURP/FCGR1A/APOBEC3A/E2F2/TYMP/ZWINT/MAFB/LILRB1/TK1/ITGAX/TLR4/KIF2C/TRIP13/DLGAP5/SLC31A2/E2F7/BIRC5/LILRA1/DMXL2/DHFR/HSPA6/MARCKS/LMO2/LILRB2/TNFAIP2/WDFY3/SIRPB2/LILRA6/CDC6/PTAFR/SECTM1/ORC1/MTMR11/FGR/KIF23/NOD2/CCNB1/ALOX5/TIMELESS/RIN2/STAB1/CDC45/MCM10/CDK1/STIL/CDCA8/ESPL1/RAD54L/RBM47/GPSM2/FCGR2A/SPI1/MYBL2/NPL/CDCA5/KIF11/LMNB1/SORT1/GMNN/CYB…	0.889390223
LI.M11.0 enriched in monocytes (II)	0.487236171	1.451942064	2.39E-06	AQP9/CCR1/ADAP2/MYOF/FCGR1A/TYMP/MAFB/LILRB1/ITGAX/TLR4/SLC31A2/LILRA1/FPR2/DMXL2/SGK1/HSPA6/SMPDL3A/LMO2/LILRB2/TNFAIP2/LILRA6/PTAFR/SECTM1/MTMR11/FGR/FBP1/NOD2/ALOX5/BLVRB/FCAR/RIN2/STAB1/RBM47/FCGR2A/SPI1/IFNGR2/SORT1/LYN/ANPEP/CYBB/TFEC/GLT1D1/FCGR1B/SIRPB1/P2RY13/PLXNB2/CLEC7A/LILRB3/NCF2/CSF3R/FPR1/CHST15/CSF1R/RASSF4/FGL2/NCF1/IRAK3/TLR8/CLEC4A/CD1D/MPEG1/TNFSF13/NFE2/GCA/SERPINA1/PLAUR/CP…	0.959298614
LI.M165 enriched in activated dendritic cells (II)	0.689572508	1.845119864	1.22E-05	SIGLEC1/IFIT3/RSAD2/IFIT1/SERPING1/IFIT2/HERC5/PARP9/CCL8/ATF3/TNFAIP6/IFIH1/MX2/CSF2RB/DOCK4/ST3GAL6/BCL2A1/IFI27/RBM47/HLX/IFNGR2/DAPK1	1.879181165
LI.M37.1 enriched in neutrophils (I)	0.616501763	1.70510114	4.00E-05	FFAR2/FCGR3B/ALPL/LRG1/HCAR3/TNFRSF10C/CYP4F3/LIN7A/KCNJ15/FPR2/G0S2/PTAFR/CMTM2/FCGR2A/CXCR1/GLT1D1/PFKFB4/PROK2/CSF3R/LRRC4/FPR1/DGAT2/RNF24/RGL4/KRT23/NFE2/STEAP4/ORM1/MANSC1/VNN3/BASP1/SLC22A4/C5AR1/MSRB1/TREM1	1.212805279
LI.M29 proinflammatory cytokines and chemokines	0.868112613	1.963898835	0.00010199	TNF/CCRL2/CCL3/IL1B/CCL3L3/IL6/PTX3	2.429387037
LI.M245 translation initiation factor 3 complex	0.812285837	1.935363748	0.000301701	UXT/EEF1G/RPL3/TUT1/EIF3D/FBL/PHB2/EIF3F/EEF1B2/EIF3H/EIF3K/EIF3G	-2.283324328
LI.M127 type I interferon response	0.798089121	1.872362823	0.001586394	RSAD2/IFIT1/IRF7/DDX60/HERC5/STAT1/PARP9/IFIH1/USP18/TAP1	2.683296373
LI.M75 antiviral IFN signature	0.674689412	1.7219625	0.002057059	RSAD2/IFIT1/SERPING1/OAS3/IRF7/DDX60/HERC5/IL1B/IFIH1/PTX3/C1QB/OAS1/PML	2.091364502
LI.S4 Monocyte surface signature	0.499328527	1.434323859	0.002869508	HCAR3/CCR1/LILRB1/TLR4/MARCO/P2RX1/S1PR3/FPR2/DYSF/PTGIR/LILRB2/PTAFR/NRROS/FCAR/SLC24A4/FCGR2A/MCTP1/CLEC12B/FCGR1B/SIRPB1/P2RY13/LILRB3/CSF3R/NFAM1/FPR1/P2RY2/SLC16A3/PTPRE/KCNE3/SLC11A1/TLR1/STEAP4/GPER1/TNFRSF10B/TLR5/LTBR/ABCA1/CCR2/ANO10/C5AR1/SIGLEC9/LRP1/TREM1/TMEM154/PECAM1	0.926341526
LI.M118.0 enriched in monocytes (IV)	0.538779488	1.494271204	0.003599304	HCAR3/CXCR2/ACSL1/DOK3/PTGS2/PTX3/DUSP6/BCL6/ST3GAL6/DYSF/TNFSF13B/DOCK5/SLC24A4/MPP1/EVI5/LRRK2/NACC2/SMARCD3/RHOU/LY96/MYO1F/TLR1/STEAP4/LGALS3/CD68/LTBR/NAIP/DPYD/HHEX/CARD9/FGD4/PGD/HLA-DMB	1.046369277
LI.M132 recruitment of neutrophils	0.777124086	1.796453049	0.00655339	FFAR2/HCAR3/FPR2/PTAFR/CXCR1/GNG10/PROK2/F2RL1/FPR1	1.418803584
LI.M65 IL2, IL7, TCR network	0.759763306	1.782448266	0.007125382	TRBC1/ITK/TRAC/LTB/IL7R/CCR7/TRAV20/JAK3/LCK/PTPRCAP	-1.370101719
LI.M36 T cell surface, activation	0.757760031	1.777748466	0.007125382	CD40LG/LILRB1/CD3E/LILRB4/CD3D/LILRB2/LILRB3/CD8A	0.010863474
LI.M73 enriched in monocytes (III)	0.756276644	1.774268357	0.007125382	HCAR3/CCR1/IER3/DUSP6/BCL6/RIN2/FOS/TFEC/CEBPB/TIMP2/MAML3	1.59392143
LI.M7.0 enriched in T cells (I)	0.512040944	1.436755605	0.015190809	TRBC1/ITK/CD2/TRAC/CD3E/LAT/KLRB1/SIRPG/CCL5/CD3D/GZMK/IL7R/MAL/ITM2A/CD247/NELL2/IL32/FLT3LG/GZMM/TRAV20/LCK/UBASH3A/CD27/GNLY/PTPRCAP/EOMES/SIT1/LEF1/TRAT1/PRF1/GIMAP7/CD7/NKG7/TIGIT/GZMA/CD28/GZMH/ZAP70/ETS1/CD96/XCL2	-1.118425425
LI.M150 innate antiviral response	0.730759832	1.714404453	0.016485351	RSAD2/IFIT1/OAS3/OASL/IRF7/APOBEC3A/EIF2AK2/OAS1/TAP1	2.458608955
LI.M5.1 T cell activation and signaling	0.611276871	1.576108479	0.016485351	ITK/CD2/TRAC/CD3E/CD3D/TRAF3IP3/CD247/PRKAR1B/CCR7/TRAV20/IL12RB1/LCK/CD52	-1.204109783
LI.M4.1 cell cycle (I)	0.443178337	1.30709333	0.016918645	TYMS/UHRF1/CDCA2/KIF18B/HJURP/E2F2/ZWINT/KIF2C/TRIP13/DLGAP5/E2F7/BIRC5/DHFR/CDC6/KIF23/CCNB1/TIMELESS/CDC45/MCM10/CDK1/CDCA8/ESPL1/RAD54L/GPSM2/MYBL2/CDCA5/KIF11/GMNN/TTK/UBE2C/MCM2/NUSAP1/AURKB/FBXO5/MKI67/CENPW/PCNA/CEP55/PLK1/SPDL1/DSCC1/NCAPG/TPX2/CDC20/PRKAR2B/ASPM/GINS2/KIF20A/PRIM1/EXO1/GINS4/CKS2/ZWILCH/RFC5/RAD51/SMC4/SMC2/UBE2S/NUF2/SPC24/CCNA2/ANLN/CCNE2/HELLS/TACC3/CENPF/DTL/MCM4/NCA…	0.796324323
LI.M5.0 regulation of antigen presentation and immune response	0.479233315	1.374104376	0.020128469	TRBC1/FYN/ITK/LIME1/LILRB1/TRAC/TLR4/CD3E/DUSP6/LCP2/TLR6/CD3D/LILRB2/FGR/KLRK1/CD247/HLA-DOB/FOS/MYD88/LYN/FCGR1B/CCR7/MEF2C/CLEC7A/LCK/UBASH3A/TLR7/IRAK3/LY96/VASP/TLR1/NCKAP1L/MEF2A/TRAT1/NFKBIA/HCK/MNDA/BTK/TLR5/BTLA/HLA-DPB1/SYK/HLA-DPA1/CD19/HLA-DMB	0.292305739
LI.M171 heme biosynthesis (I)	0.723646212	1.672829948	0.028550453	ALAS2/AHSP/E2F2/FECH/TMOD1/HEMGN/GATA1	1.768737873
LI.M67 activated dendritic cells	0.706446516	1.657364021	0.028692518	C1QC/RSAD2/SERPING1/IRF7/DDX60/IFIH1/C2/IGKC	2.181328699
LI.M4.3 myeloid cell enriched receptors and transporters	0.566692248	1.495488729	0.031159447	CCR1/MYOF/SLC2A6/MARCO/LILRA1/SECTM1/MTMR11/SLC24A4/CHST15/LRRC25/TLR8/CLEC4A/CD1D/MPEG1/GPBAR1/KCTD12/IGSF6/TLR5/SLC8A1	1.124417081
LI.M4.9 mitotic cell cycle in stimulated CD4 T cells	0.642778728	1.570934997	0.038359134	TRIP13/CDC6/GMNN/ZNF367/SPDL1/RRM1/RBBP8/RAD51/MASTL/KIF14/DONSON/CENPF/EZH2	0.898112176
LI.M26.0 TBA	0.663319681	1.598422868	0.040956157	GIPC2/CDHR5/SLC39A5/GPA33/CRABP2/MYO1A/NR1I2/VIL1	0.002825509
LI.M64 enriched in activated dendritic cells/monocytes	0.648392184	1.5763541	0.044664434	IL1RN/IL1B/CXCL1/SLC31A2/MARCKS/G0S2/TNFAIP2/ANPEP/NINJ1/SOD2/BASP1/DRAM1	1.456665135
LI.M131 TBA	0.659863955	1.590095494	0.04541511	CMPK2/TNS1/XK/HEMGN/RGL4/PRKAR2B/INHBA/ACTN1/GMPR	0.903336658
LI.M37.0 immune activation - generic cluster	0.385071718	1.168579335	0.049713504	FCGR3B/LRG1/HCAR3/AQP9/CXCR2/PKMYT1/ADAP2/ACSL1/TNFAIP6/CXCL1/CD2/CYP4F3/DOK3/LIN7A/STX11/CD3E/PTGS2/FCGR2C/CSF2RB/KCNJ15/PTX3/LAT/DUSP6/BCL6/FPR2/BLM/BORA/C3AR1/ST3GAL6/SGK1/DYSF/CR1/TSPAN2/SMPDL3A/GAB1/HP/G0S2/FBP1/GALNT6/DOCK5/BLVRB/CHI3L2/MAL/FCAR/MBOAT2/SLC24A4/CMTM2/PRTFDC1/B3GNT5/ESCO2/LRRK2/CHAF1A/GPR84/MCTP1/TSHR/VPREB3/LYN/ANPEP/OLFM4/NACC2/RGL1/CD1B/SIRPB1/PFKFB4/P2RY13/SLC27A2/PROK2/M…	0.495809643
